# Supplementary material for: Cornflower Extract and Its Active Components Alleviate Dexamethasone-Induced Muscle Wasting by Targeting Cannabinoid Receptors and Modulating Gut Microbiota
Source: MDPI journal article supplement (doi:10.3390/nu16081130), 2024-04-11
Supplement: s1 [file s1]

## ***Supplementary Materials***

### **List of Figures and Table**

#### **Table S1.** HPLC running method

**Figure S1.** (A)  $^1\text{H}$ -NMR spectrum of compound **1** in  $\text{CH}_3\text{OH}-d_4$  at 400 MHz. (B)  $^{13}\text{C}$ -NMR spectrum of compound **1** in  $\text{CH}_3\text{OH}-d_4$  at 100 MHz

**Figure S2.** (A)  $^1\text{H}$ -NMR spectrum of compound **2** in  $\text{CH}_3\text{OH}-d_4$  at 500 MHz. (B)  $^{13}\text{C}$ -NMR spectrum of compound **2** in  $\text{CH}_3\text{OH}-d_4$  at 125 MHz

**Figure S3.** (A)  $^1\text{H}$ -NMR spectrum of compound **3** in  $\text{CH}_3\text{OH}-d_4$  at 500 MHz. (B)  $^{13}\text{C}$ -NMR spectrum of compound **3** in  $\text{CH}_3\text{OH}-d_4$  at 125 MHz.

**Figure S4.** (A)  $^1\text{H}$ -NMR spectrum of compound **4** in  $\text{CH}_3\text{OH}-d_4$  at 500 MHz. (B)  $^{13}\text{C}$ -NMR spectrum of compound **4** in  $\text{CH}_3\text{OH}-d_4$  at 125 MHz.

**Figure S5.** (A)  $^1\text{H}$ -NMR spectrum of compound **5** in  $\text{DMSO}-d_6$  at 500 MHz. (B)  $^{13}\text{C}$ -NMR spectrum of compound **5** in  $\text{DMSO}-d_6$  at 125 MHz

**Figure S6.** (A)  $^1\text{H}$ -NMR spectrum of compound **6** in  $\text{CH}_3\text{OH}-d_4$  at 500 MHz. (B)  $^{13}\text{C}$ -NMR spectrum of compound **6** in  $\text{CH}_3\text{OH}-d_4$  at 125 MHz

**Figure S7.** (A)  $^1\text{H}$ -NMR spectrum of compound **7** in  $\text{CH}_3\text{OH}-d_4$  at 500 MHz. (B)  $^{13}\text{C}$ -NMR spectrum of compound **7** in  $\text{CH}_3\text{OH}-d_4$  at 125 MHz

**Figure S8.** (A)  $^1\text{H}$ -NMR spectrum of compound **8** in  $\text{CH}_3\text{OH}-d_4$  at 500 MHz. (B)  $^{13}\text{C}$ -NMR spectrum of compound **8** in  $\text{CH}_3\text{OH}-d_4$  at 125 MHz

**Figure S9.** (A)  $^1\text{H}$ -NMR spectrum of compound **9** in  $\text{DMSO}-d_6$  at 500 MHz. (B)  $^{13}\text{C}$ -NMR spectrum of compound **9** in  $\text{DMSO}-d_6$  at 125 MHz

**Table S1.** HPLC running method

|   | <b>Time</b> | <b>ACN<br/>(0.1% FA)</b> | <b>Water<br/>(0.1% FA)</b> |
|---|-------------|--------------------------|----------------------------|
| 1 | 0.0         | 5.0                      | 95.0                       |
| 2 | 17.0        | 20.0                     | 80.0                       |
| 3 | 25.0        | 30.0                     | 70.0                       |
| 4 | 32.0        | 100.0                    | 00.0                       |
| 5 | 35.0        | 100.0                    | 00.0                       |
| 6 | 37.0        | 5.0                      | 95.0                       |
| 7 | 38.0        | 5.0                      | 95.0                       |

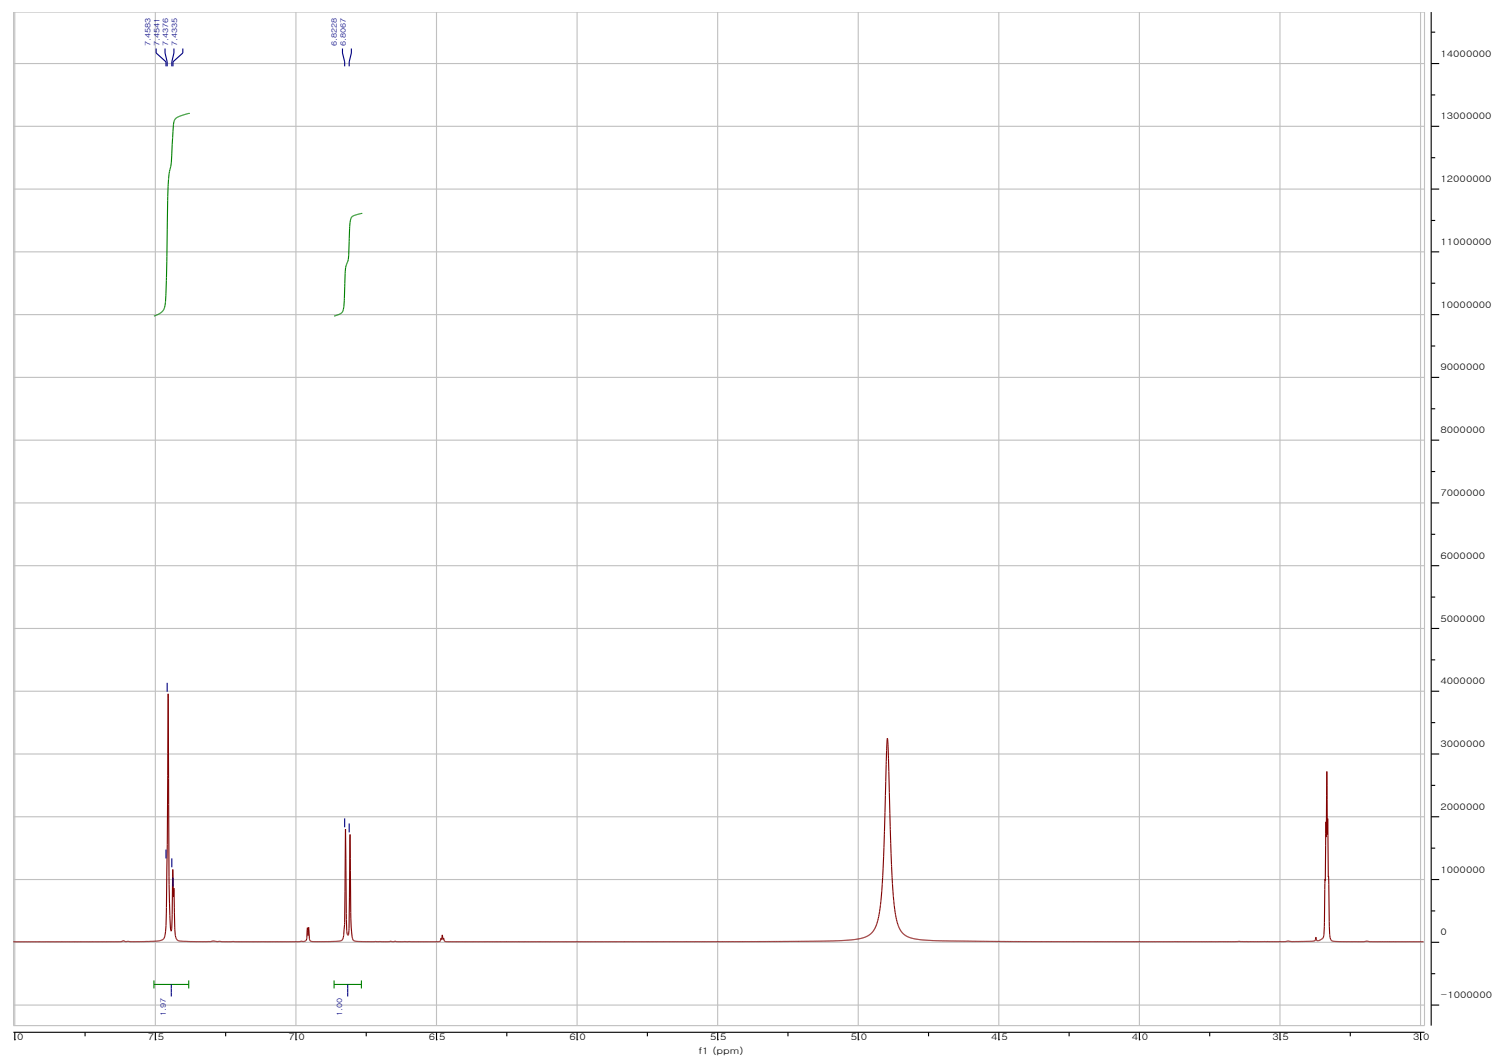

(A)

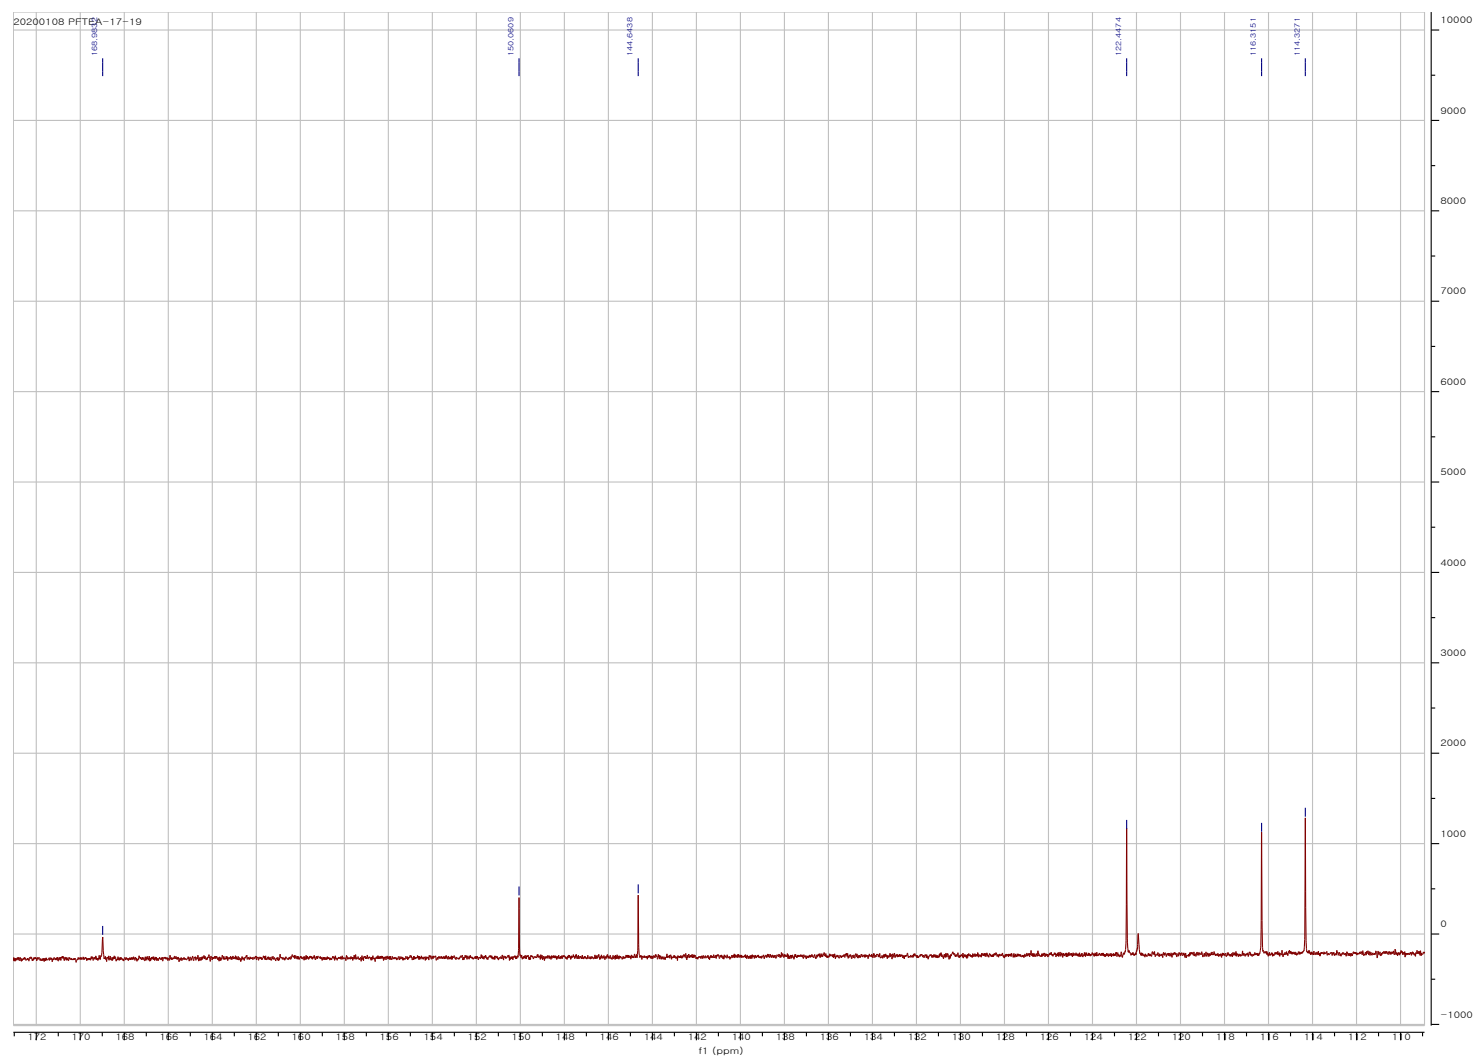

(B)

**Figure S1.** (A)  $^1\text{H}$ -NMR spectrum of compound **1** in  $\text{CH}_3\text{OH}-d_4$  at 400 MHz. (B)  $^{13}\text{C}$ -NMR spectrum of compound **1** in  $\text{CH}_3\text{OH}-d_4$  at 100 MHz.

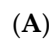

(A)





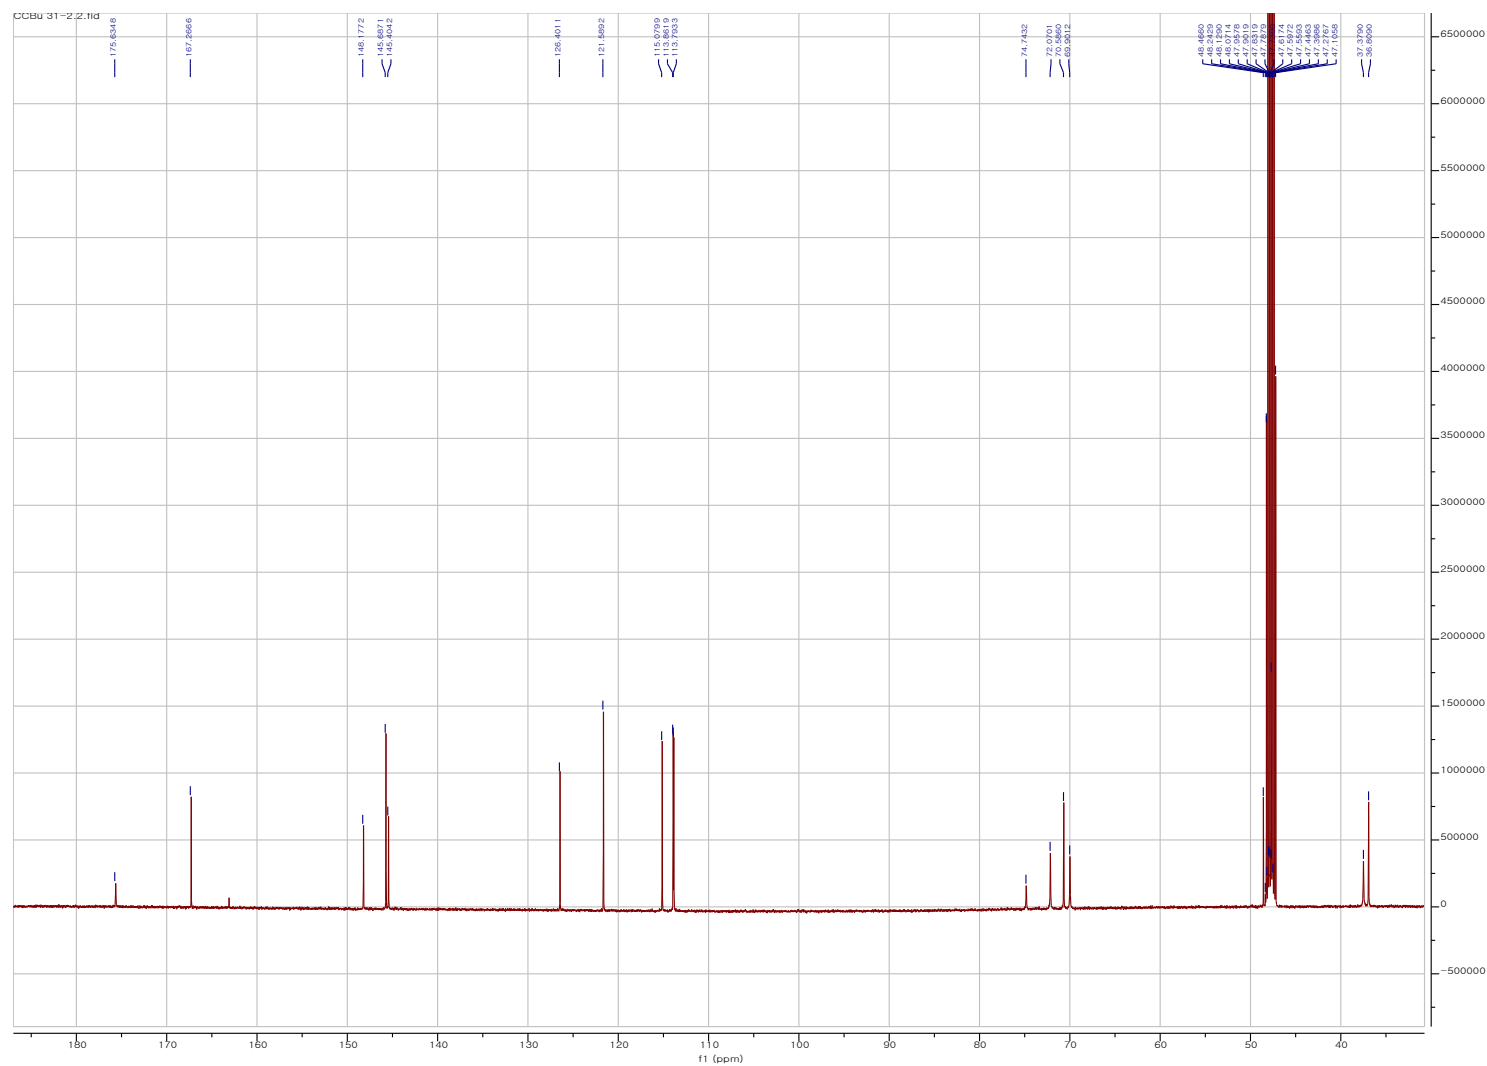

(B)

**Figure S3.** (A)  $^1\text{H}$ -NMR spectrum of compound **2** in  $\text{CH}_3\text{OH}-d_4$  at 400 MHz. (B)  $^{13}\text{C}$ -NMR spectrum of compound **2** in  $\text{CH}_3\text{OH}-d_4$  at 100 MHz.



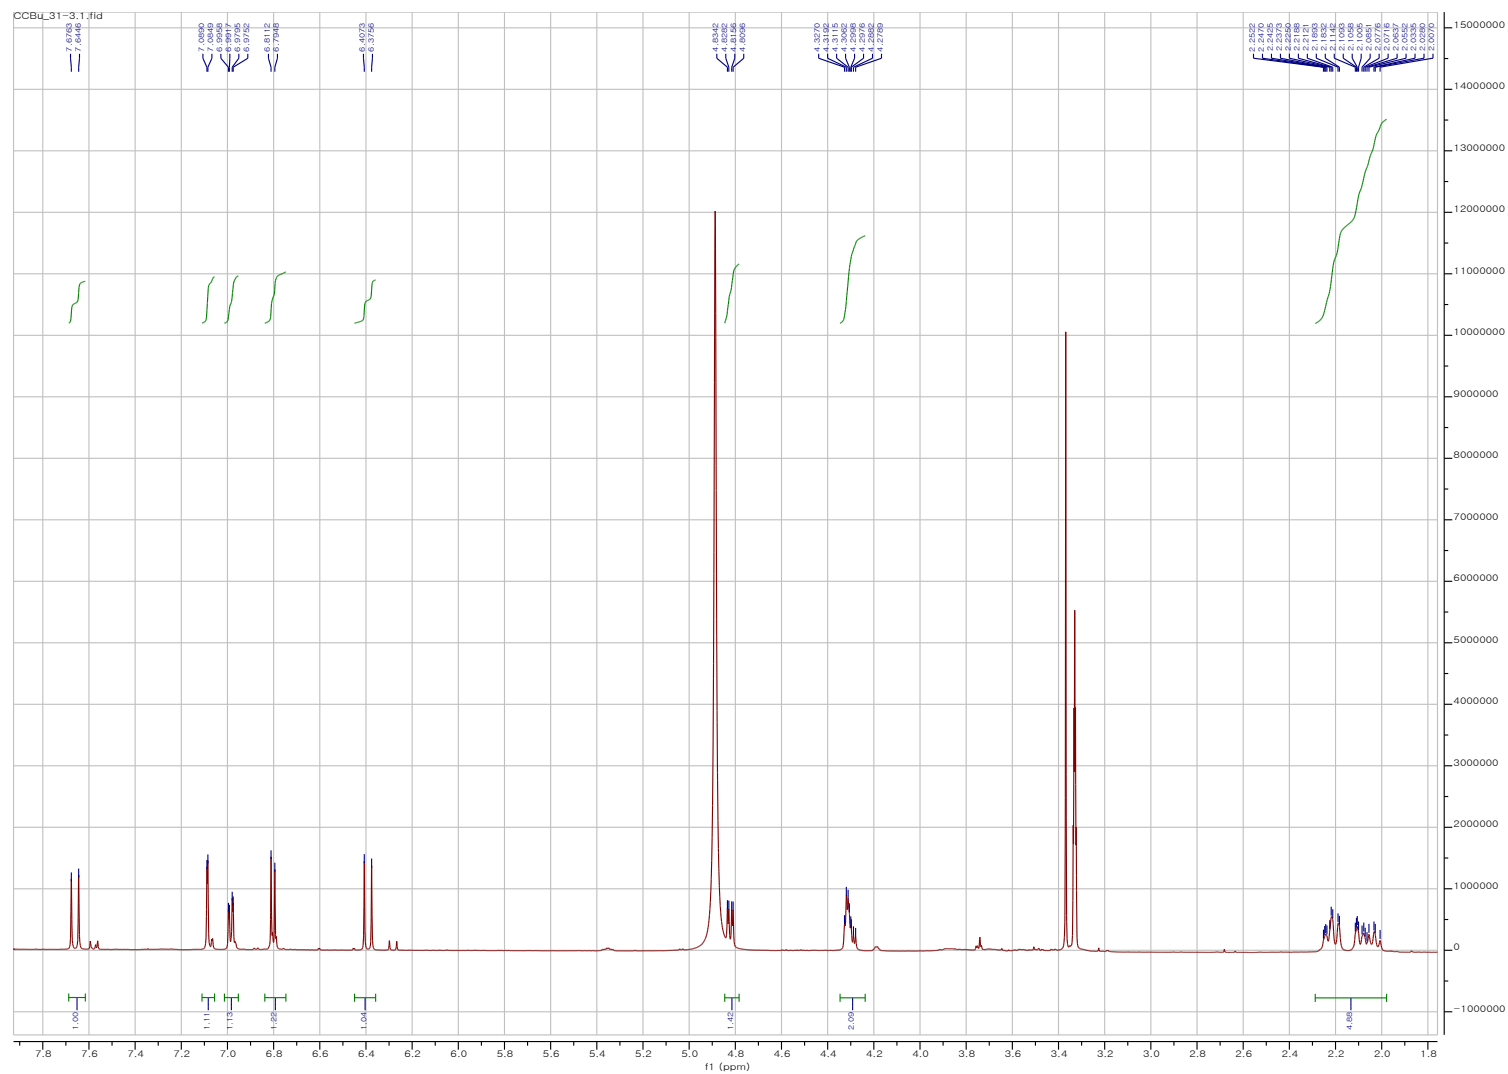

(A)



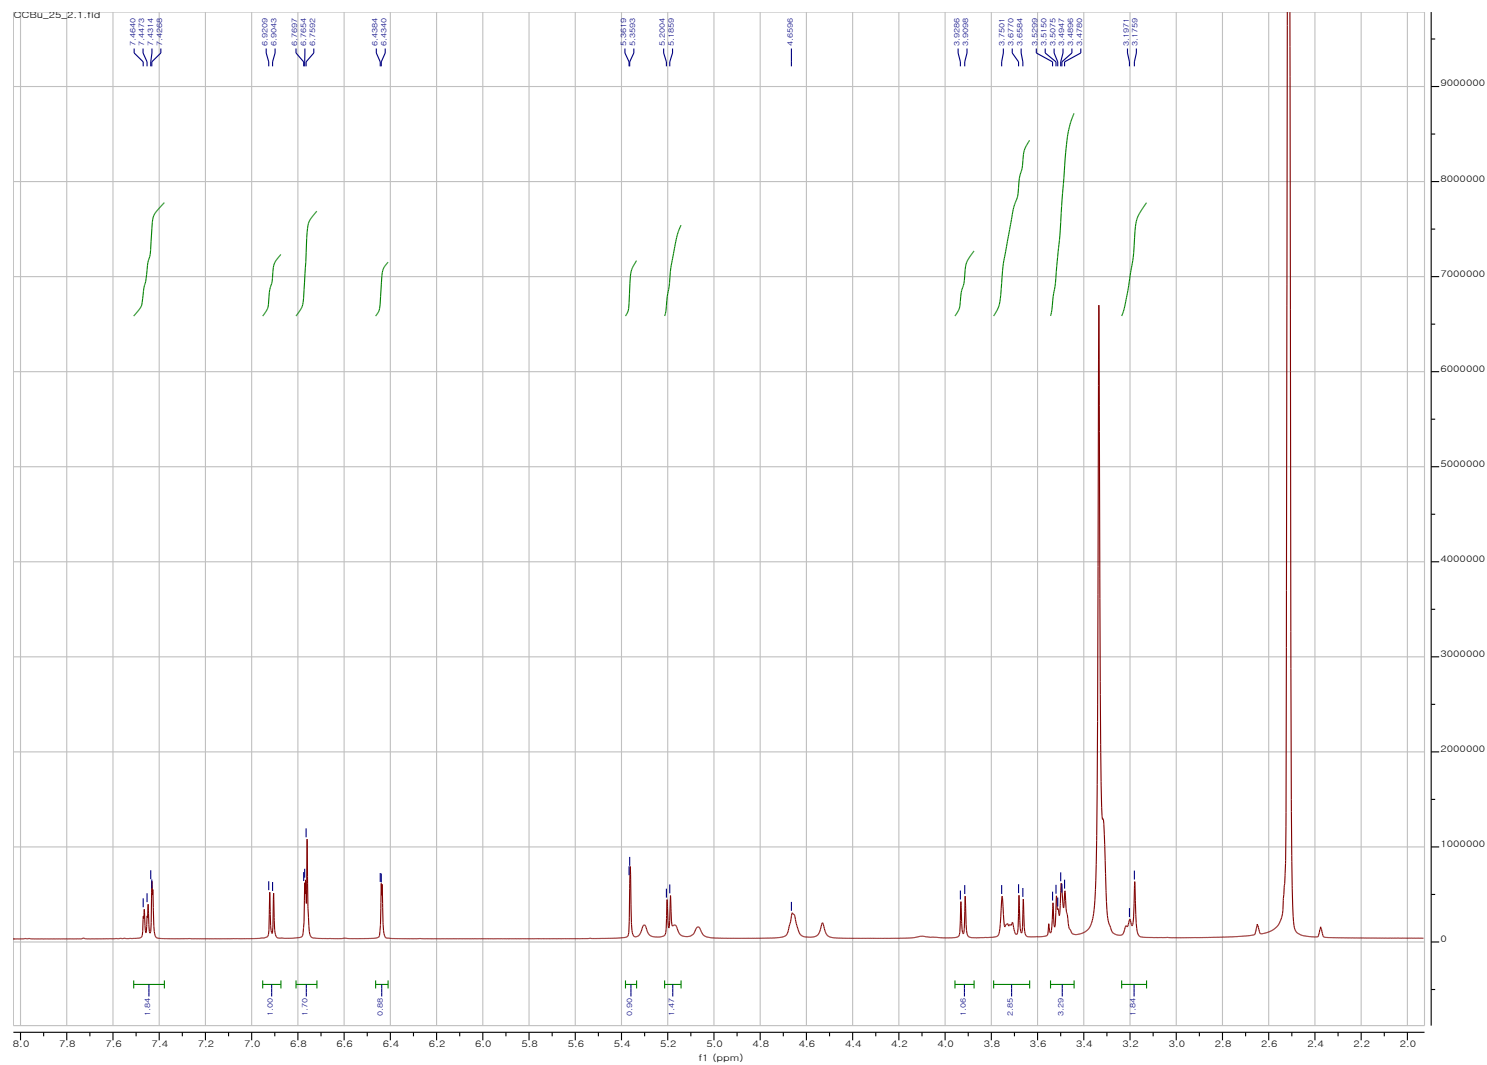

(A)

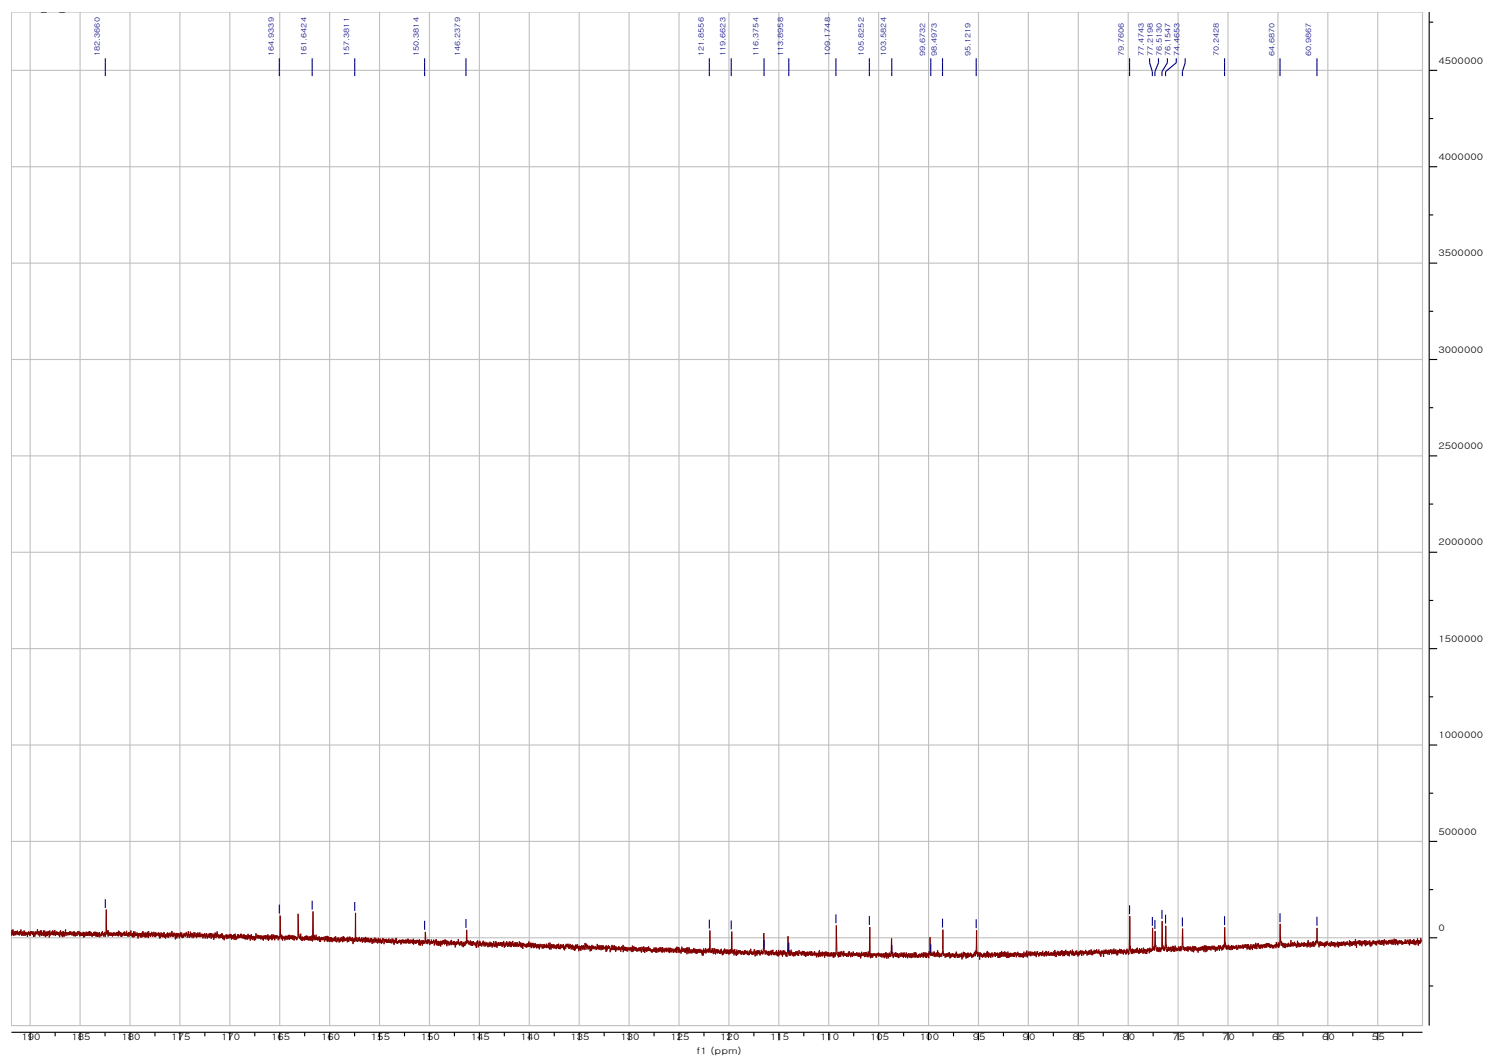

(B)

**Figure S5.** (A) <sup>1</sup>H-NMR spectrum of compound **5** in DMSO-*d*<sub>6</sub> at 500 MHz. (B) <sup>13</sup>C-NMR spectrum of compound **5** in DMSO-*d*<sub>6</sub> at 125 MHz.

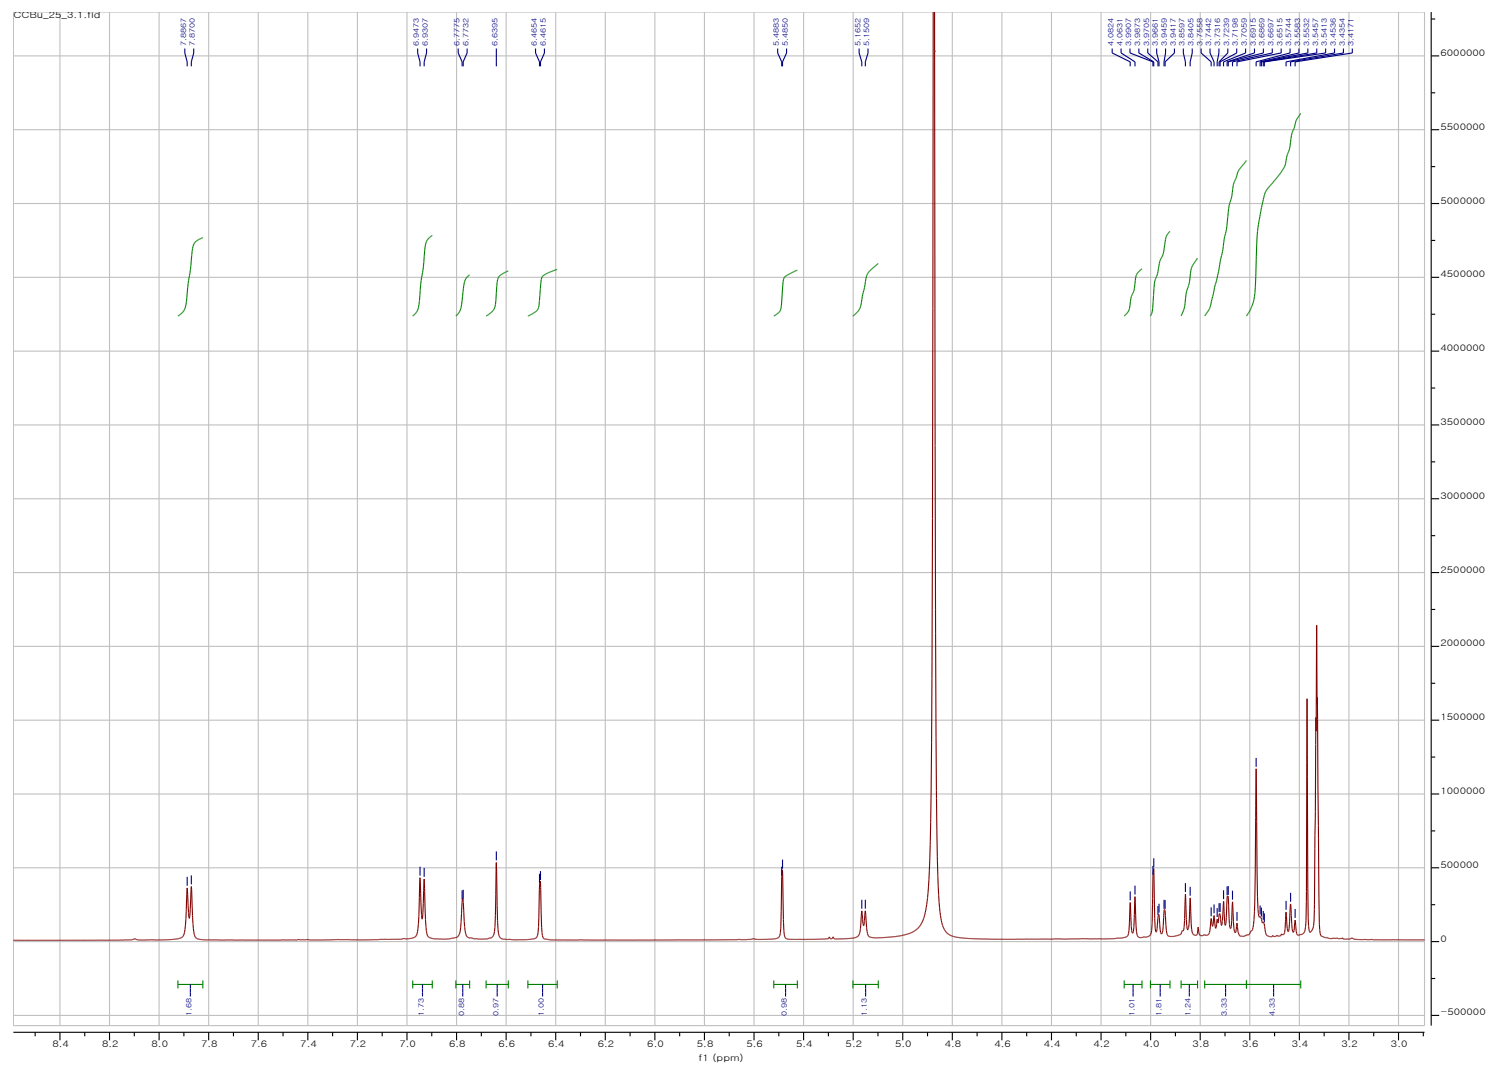

(A)

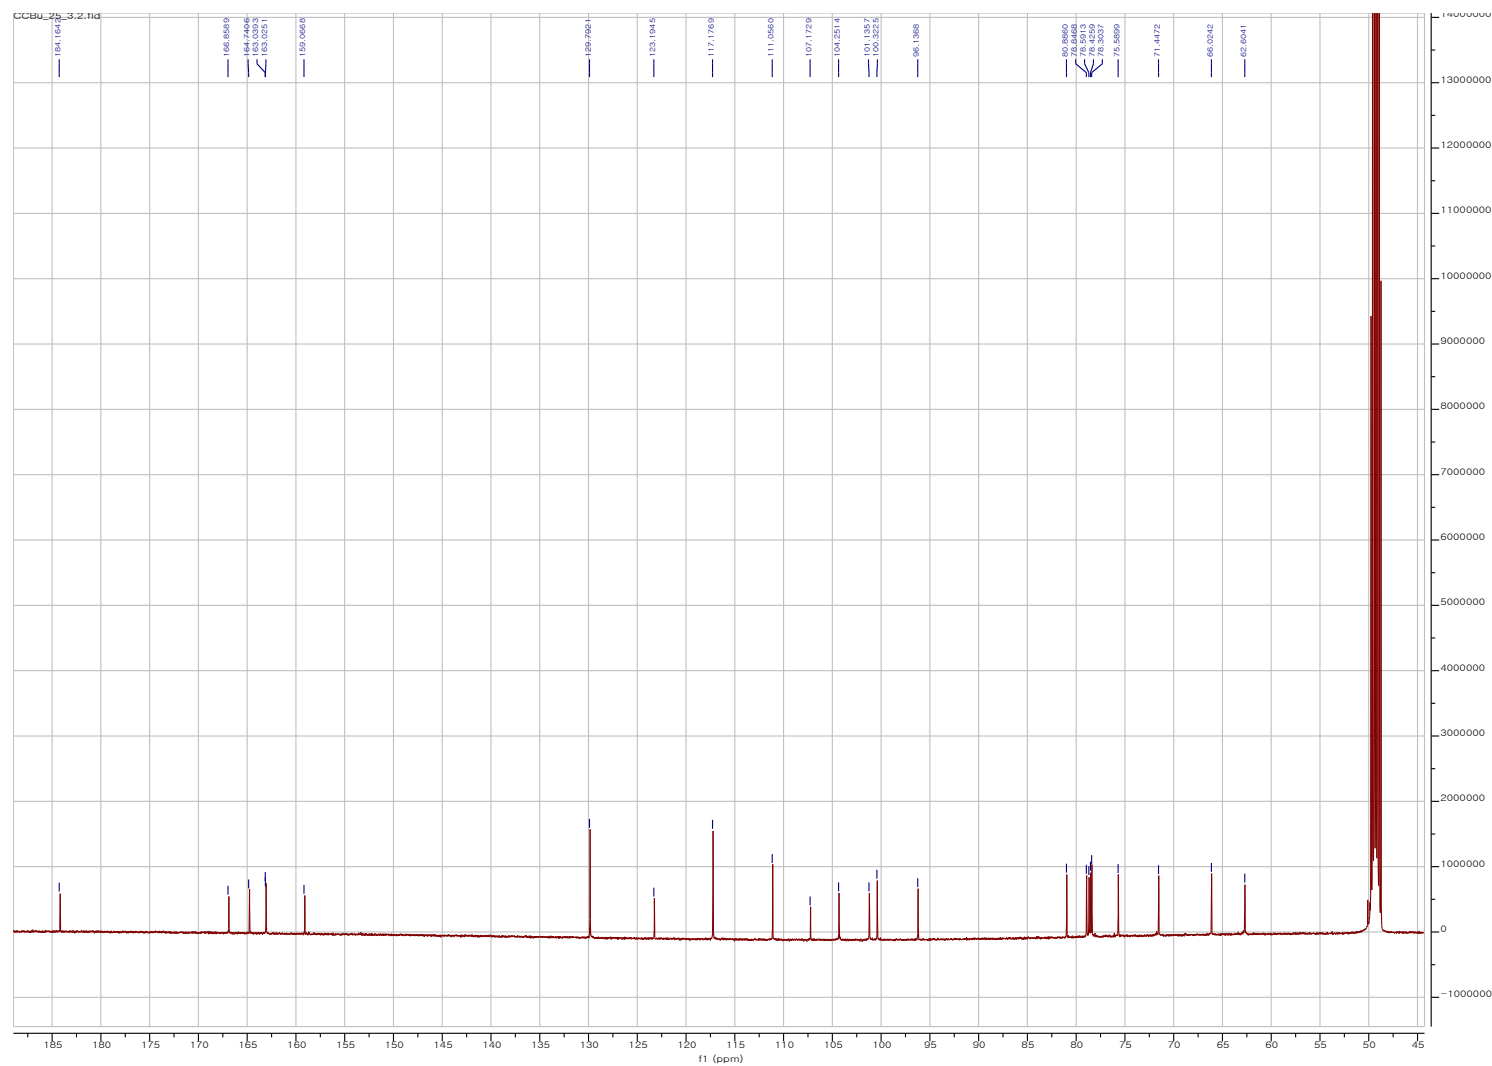

(B)

**Figure S6.** (A)  $^1\text{H}$ -NMR spectrum of compound **6** in  $\text{CH}_3\text{OH}-d_4$  at 500 MHz. (B)  $^{13}\text{C}$ -NMR spectrum of compound **6** in  $\text{CH}_3\text{OH}-d_4$  at 125 MHz.

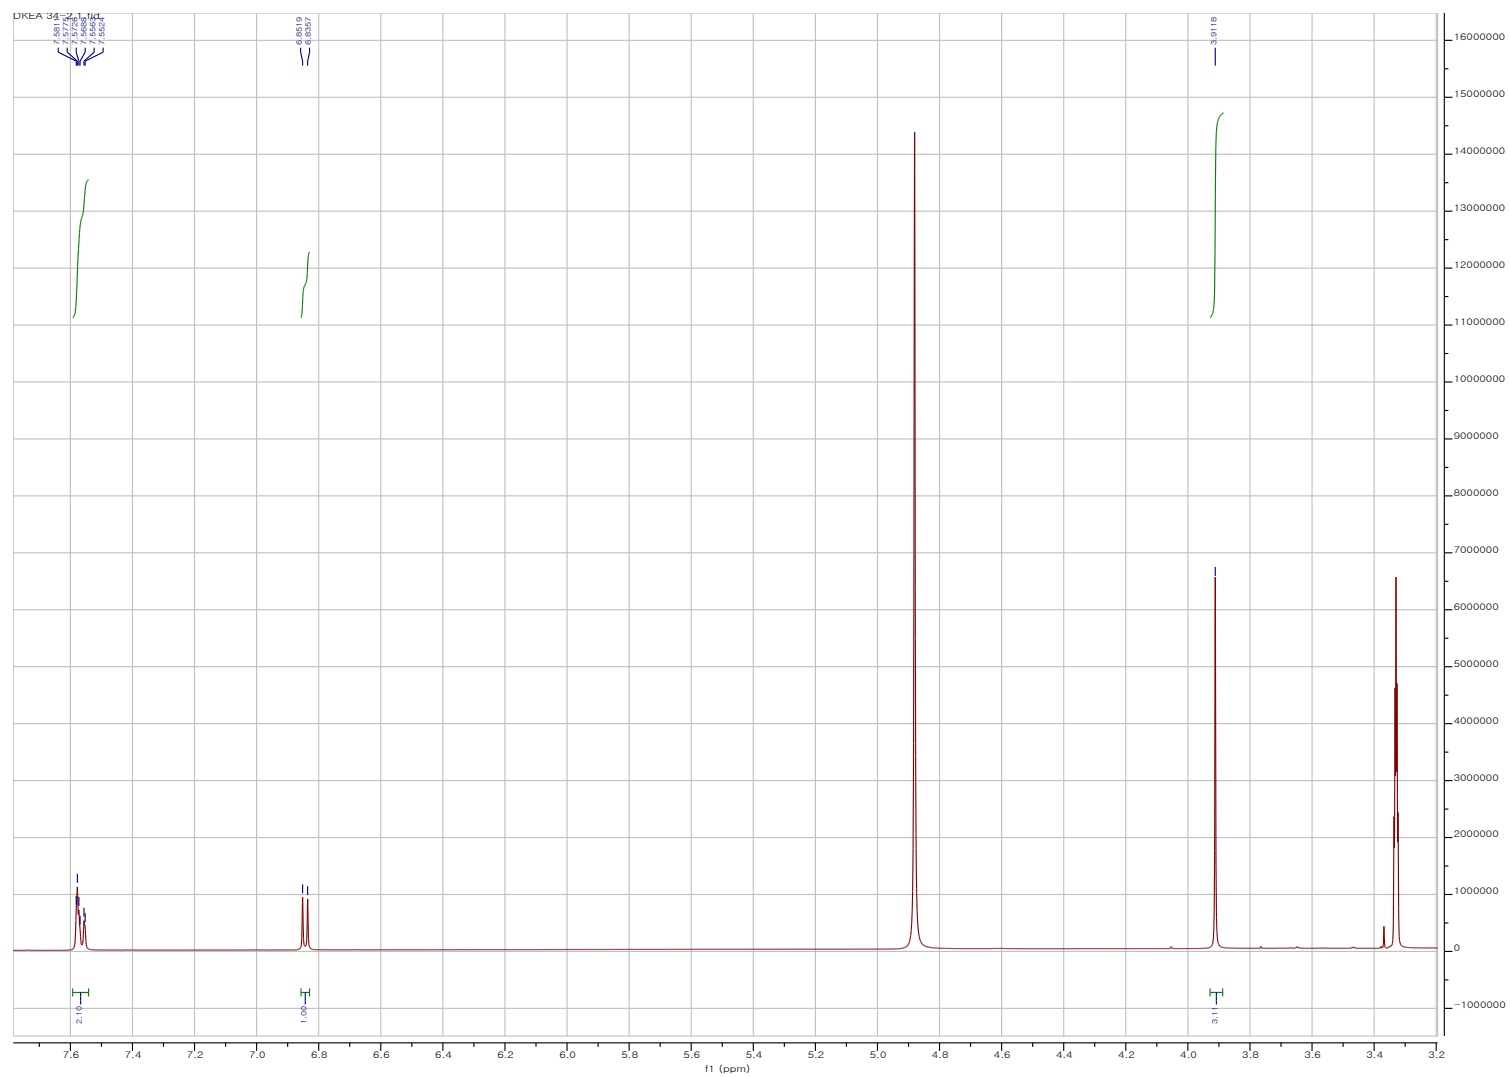

(A)

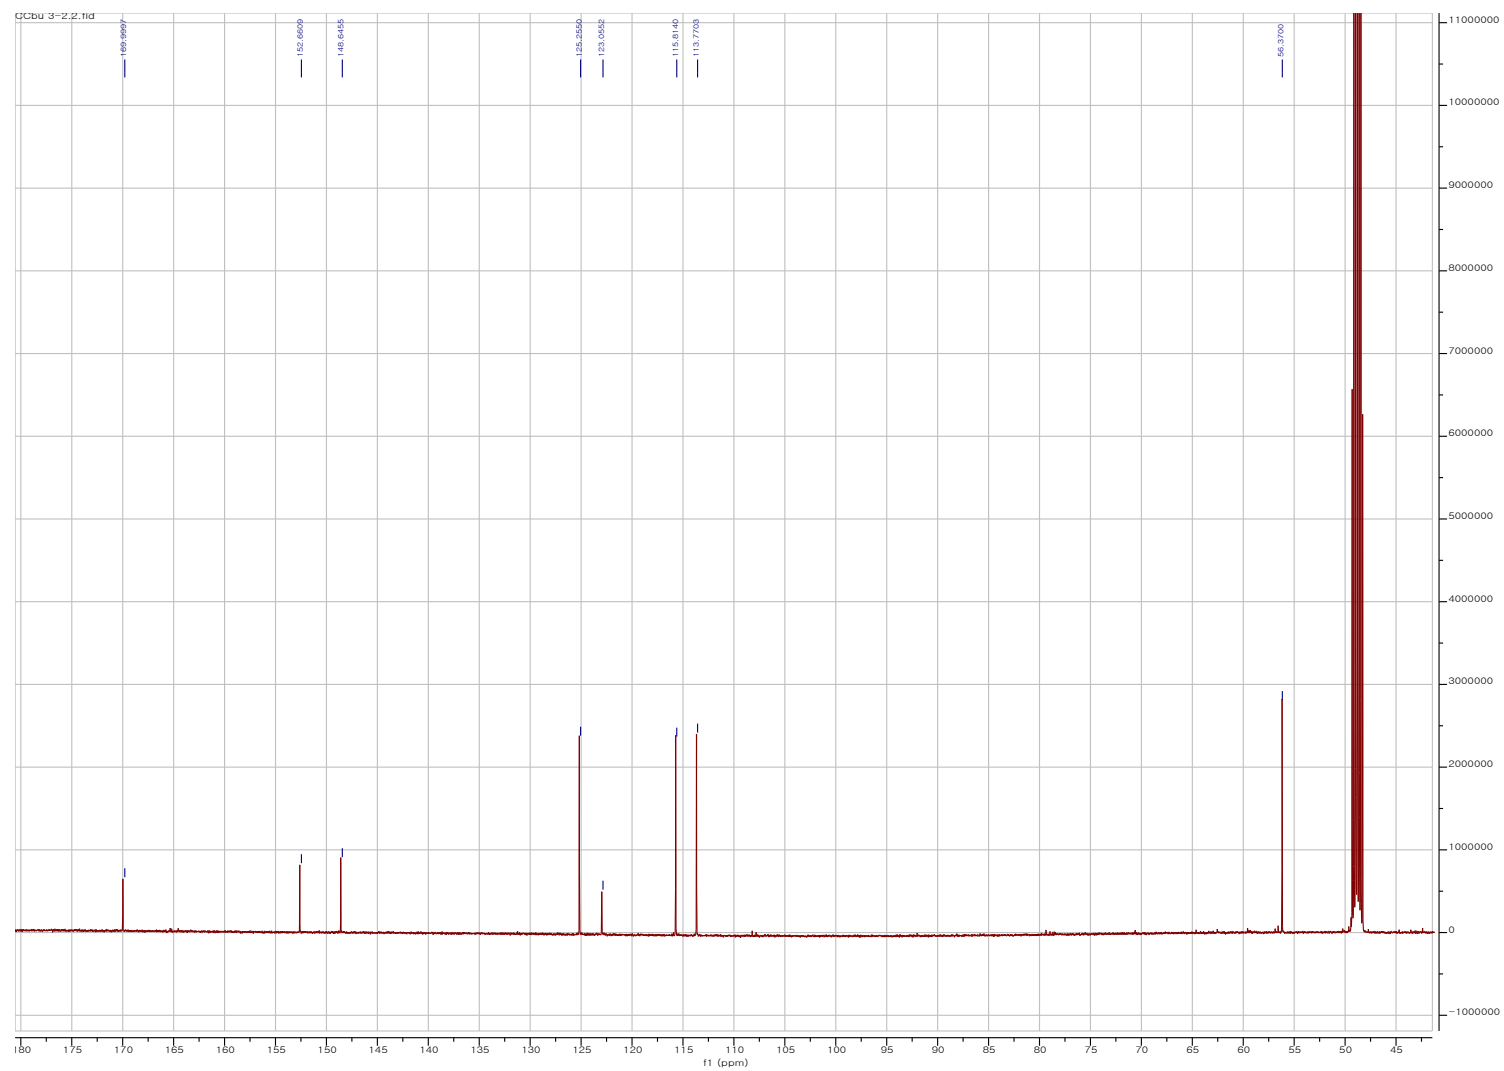

(B)

**Figure S7.** (A)  $^1\text{H}$ -NMR spectrum of compound **7** in  $\text{CH}_3\text{OH}-d_4$  at 500 MHz. (B)  $^{13}\text{C}$ -NMR spectrum of compound **7** in  $\text{CH}_3\text{OH}-d_4$  at 125 MHz.



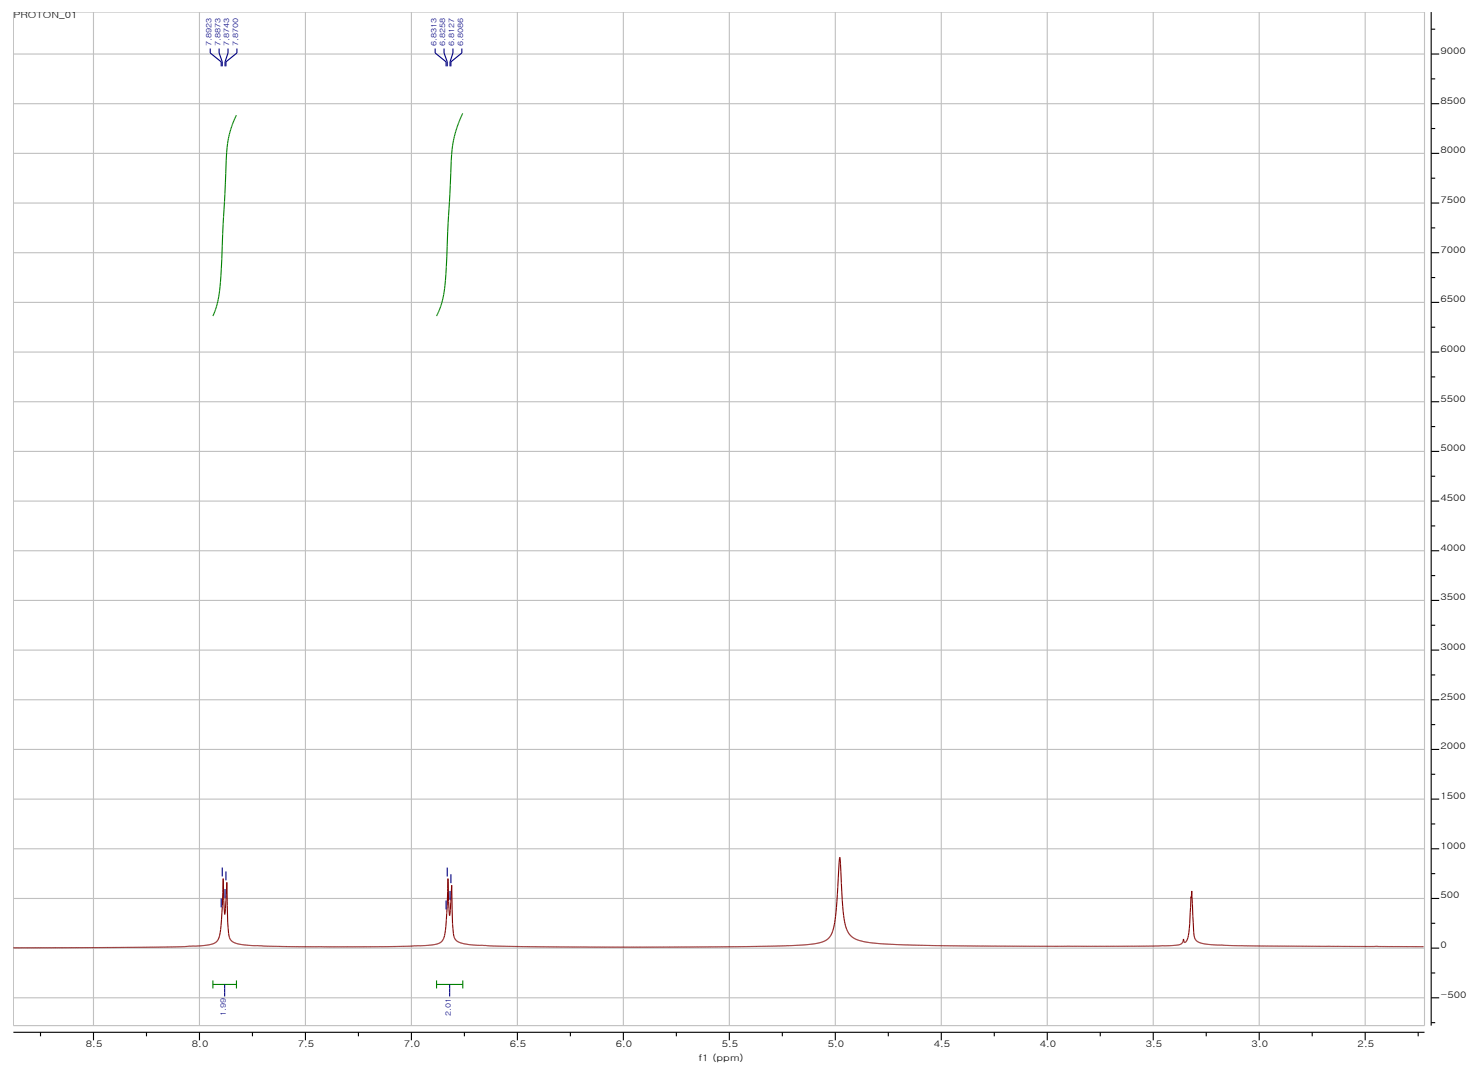

(A)

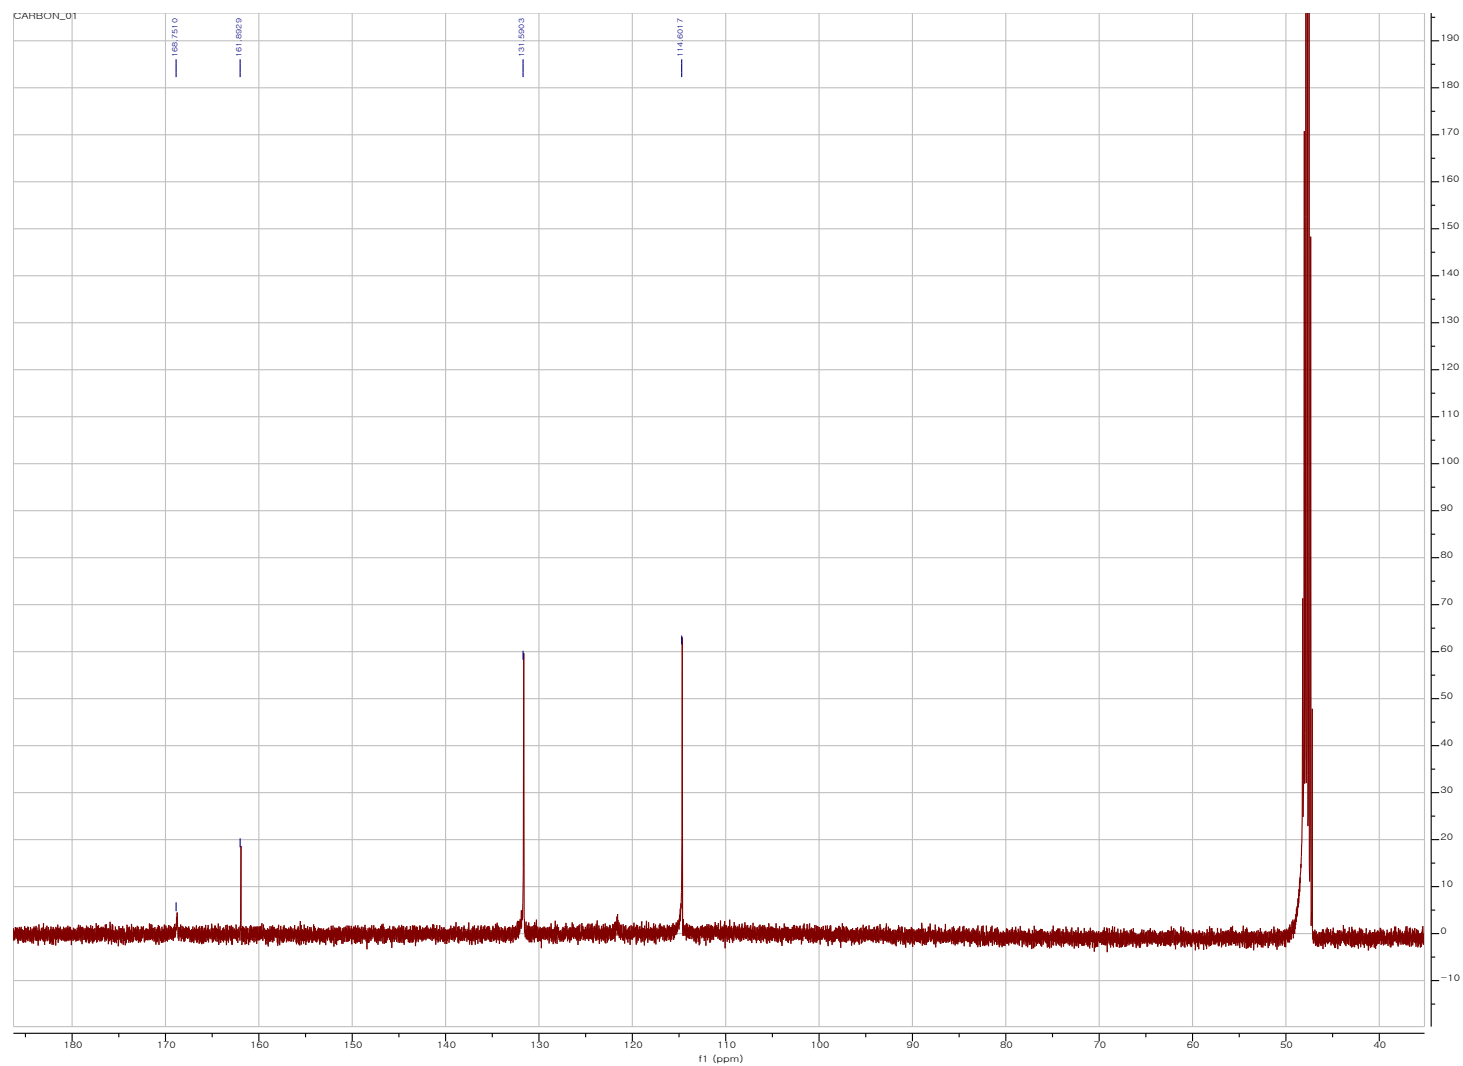

(B)

**Figure S8.** (A)  $^1\text{H}$ -NMR spectrum of compound **8** in  $\text{CH}_3\text{OH}-d_4$  at 500 MHz. (B)  $^{13}\text{C}$ -NMR spectrum of compound **8** in  $\text{CH}_3\text{OH}-d_4$  at 125 MHz.

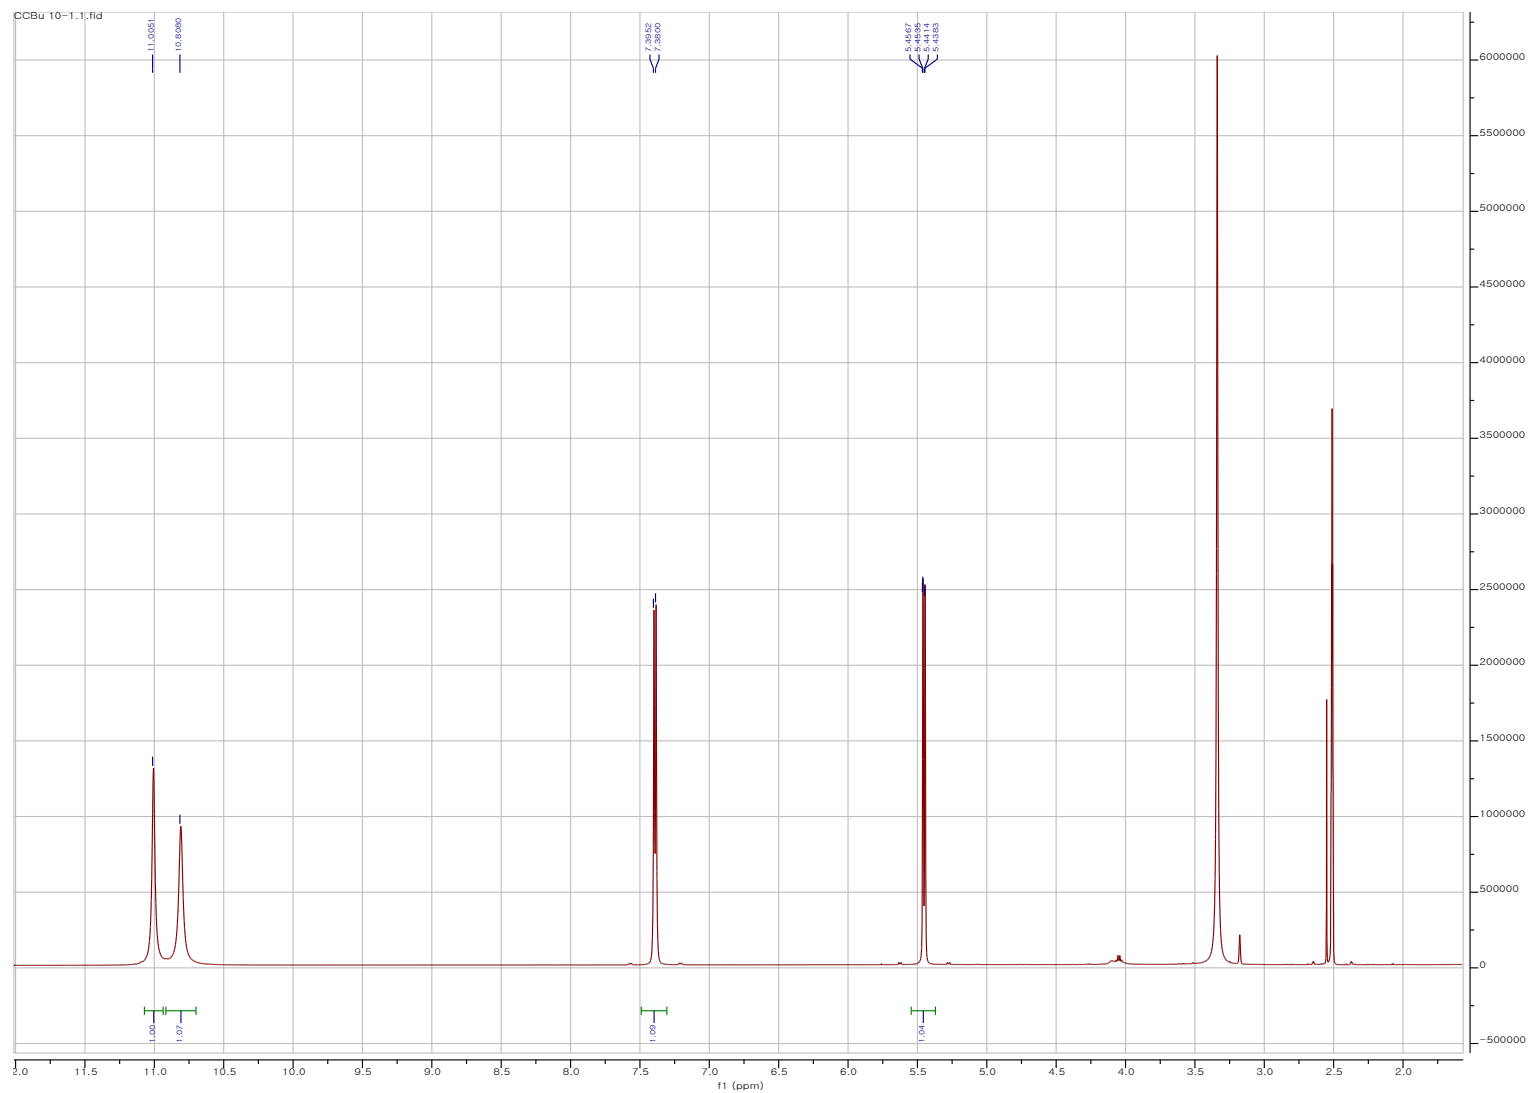

(A)

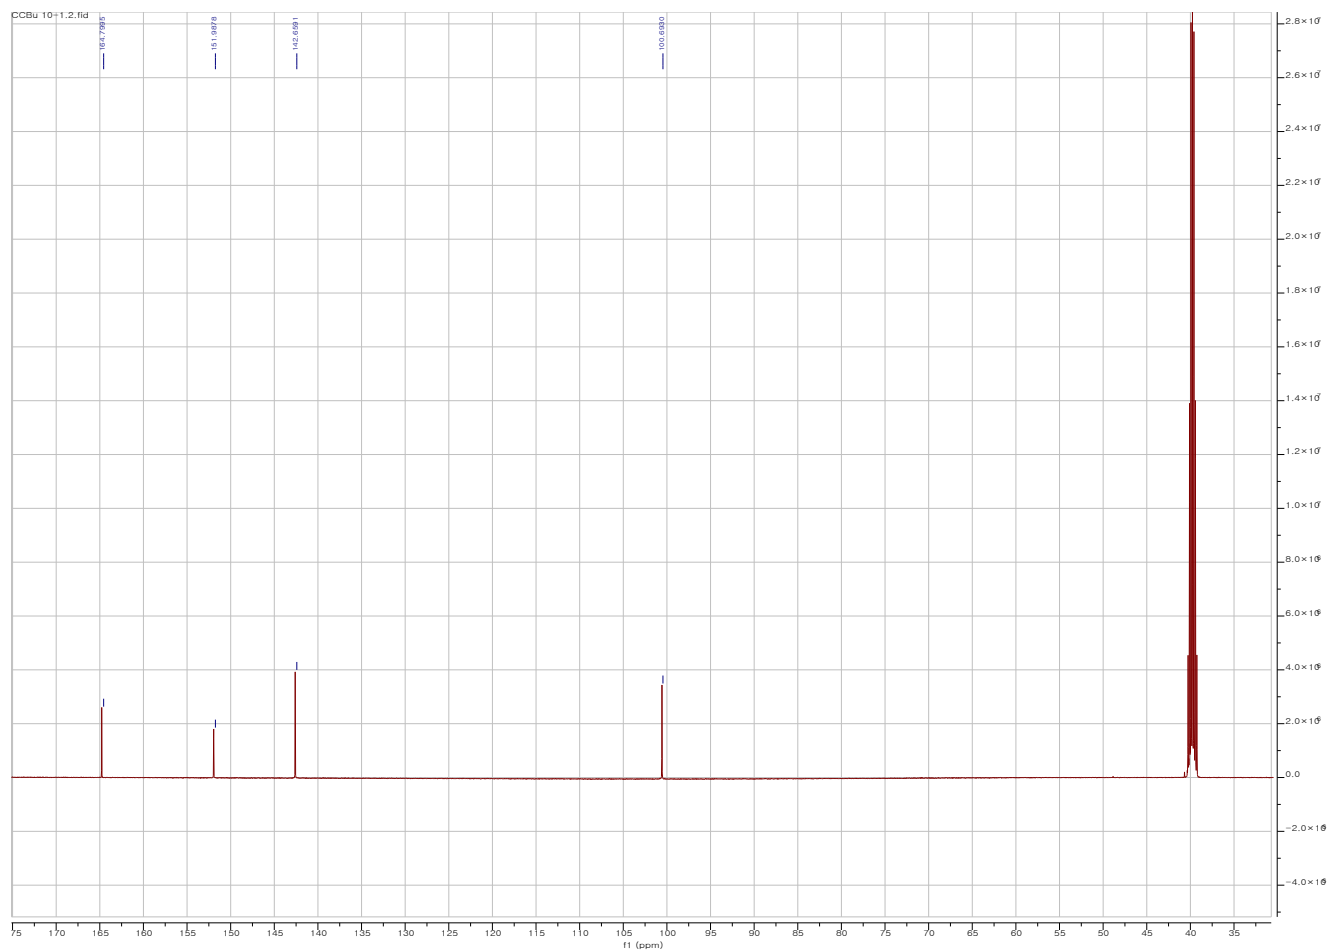

(B)

**Figure S9.** (A)  $^1\text{H}$ -NMR spectrum of compound **9** in  $\text{DMSO}-d_6$  at 500 MHz. (B)  $^{13}\text{C}$ -NMR spectrum of compound **9** in  $\text{DMSO}-d_6$  at 125 MHz.
